# Supplementary material
Source: PubMed Central journal article supplement (PMC2863182)

## SUPPLEMENTAL DATA

**SUPPLEMENTAL TABLE 1. Overview of the stereochemistry of the detected products in the reaction of CspLOX2 with different fatty acids.** Product hydroxides were analyzed using a Chiralcel OD-H column (150 × 2.1 mm, 5 µm particle size, Daicel, VWR) with a solvent system of *n*-hexane/2-propanol/trifluoroacetic acid (100:5:0.1, v/v/v) at a flow rate of 0.1 ml/min. n.a.: not analyzed.

| Substrate | Products      | R/S ratio |
|-----------|---------------|-----------|
| 18:3(n-3) | 11-HOTE       | n.a.      |
|           | 13-HOTE       | 20/80     |
|           | 12-HOTE       | n.a.      |
|           | 16-HOTE       | 65/35     |
|           | 9-HOTE        | 83/17     |
|           | 9,16-diHOTE 1 | n.a.      |
|           | 9,16-diHOTE 2 | n.a.      |
| 20:4(n-6) | 13-HETE       | n.a.      |
|           | 12-HETE       | 35/65     |
|           | 15-HETE       | 14/86     |
|           | 11-HETE       | 92/8      |

**SUPPLEMENTAL FIGURE 1. Partial amino acid sequence alignment of *Cyanotheca* sp. CspLOX2 (accession number YP\_002373243), *Nostoc punctiforme* NpLOX2 (accession number ZP 00106490), *Plexaura homomalla* Ph8R-LOX (accession number AAC47743) and *Gaeumannomyces graminis* Mn-LOX (accession number AY040824).** The alignment was done using T-Coffee. The five amino acid iron ligands and the described determinants of regio- and stereospecificity have been marked with an asterisk and li, bo (according to (1)), sl (according to (2)) and co (according to (3)), respectively.

**SUPPLEMENTAL FIGURE 2. Relative product amounts formed by CspLOX2 from 18:2(n-6), 18:3(n-3) and 20:4(n-6).** CspLOX2 (15 µg) was incubated with 250 µg of the respective substrate in 200 mM sodium borate buffer pH 9.5 and the products were reduced by SnCl<sub>2</sub>. Analysis was carried out by RP-HPLC/MS<sup>2</sup> and SP-HPLC. The figure shows mean values and standard deviations, which were calculated from three different experiments.

**SUPPLEMENTAL FIGURE 3. Reaction of CspLOX2 with 9R-HPOTE.** A) Overlay of UV spectra of the reaction of CspLOX2 (10 µg) with 9R-HPOTE (40 µM). The sample was scanned from 220 to 340 nm before addition of the substrate (t=0 min) and the reaction was completed after 9 min. One arrow indicates the decrease in absorbance at 235 nm and another indicates the increase at 269 nm, which was observed during the reaction. B) RP-HPLC-MS<sup>2</sup> analysis of the reaction products of CspLOX2 with 9R-HPOTE (*m/z* 309 → full scan). Peaks 1 and 2 contained 9,16-diHOTE. C) RP-HPLC-MS<sup>2</sup> analysis of the reaction products of CspLOX2 with 9R-HPOTE (*m/z* 291 → full scan). Peak 3 contained 9-KOTE.

## References

1. Borngräber, S., Kuban, R. J., Anton, M., and Kühn, H. (1996) *J. Mol. Biol.* 264, 1145-1153
2. Sloane, D. L., Leung, R., Craik, C. S., and Sigal, E. (1991) *Nature* 354, 149-152
3. Coffa, G., and Brash, A. R. (2004) *Proc. Natl. Acad. Sci. USA* 101, 15579-15584

Figure 1

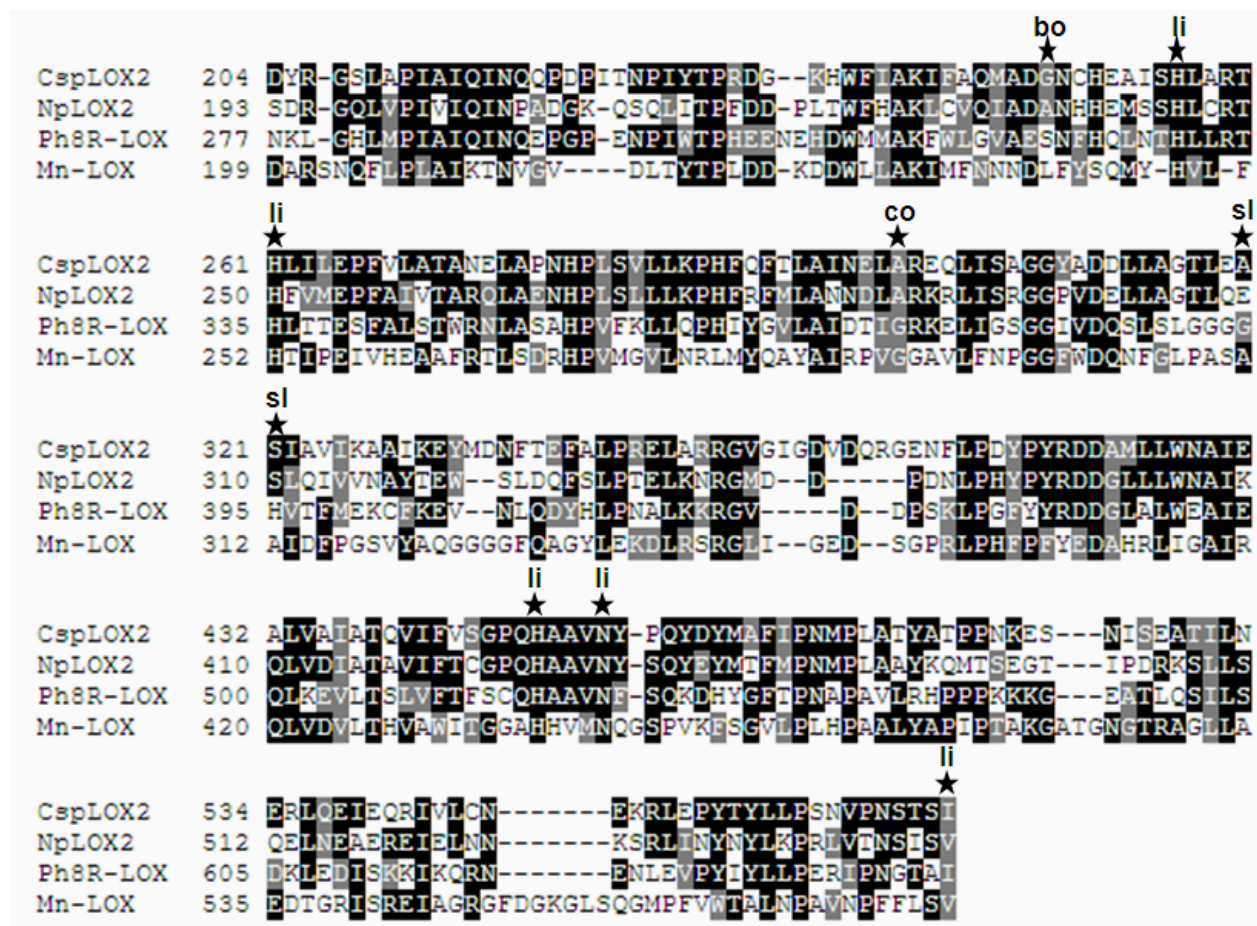

Figure 2

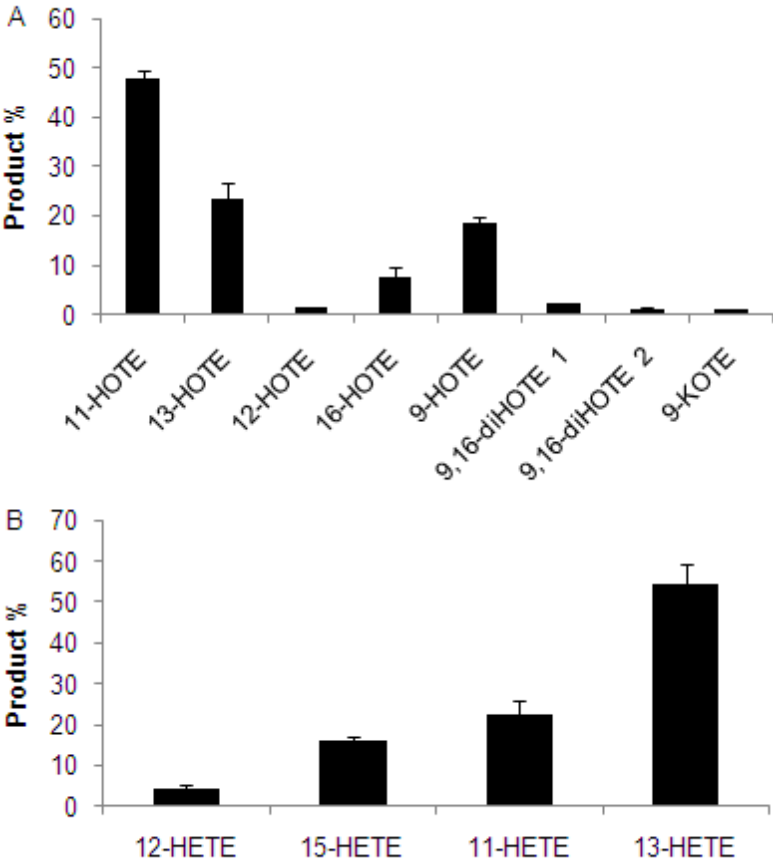

**Figure 3**

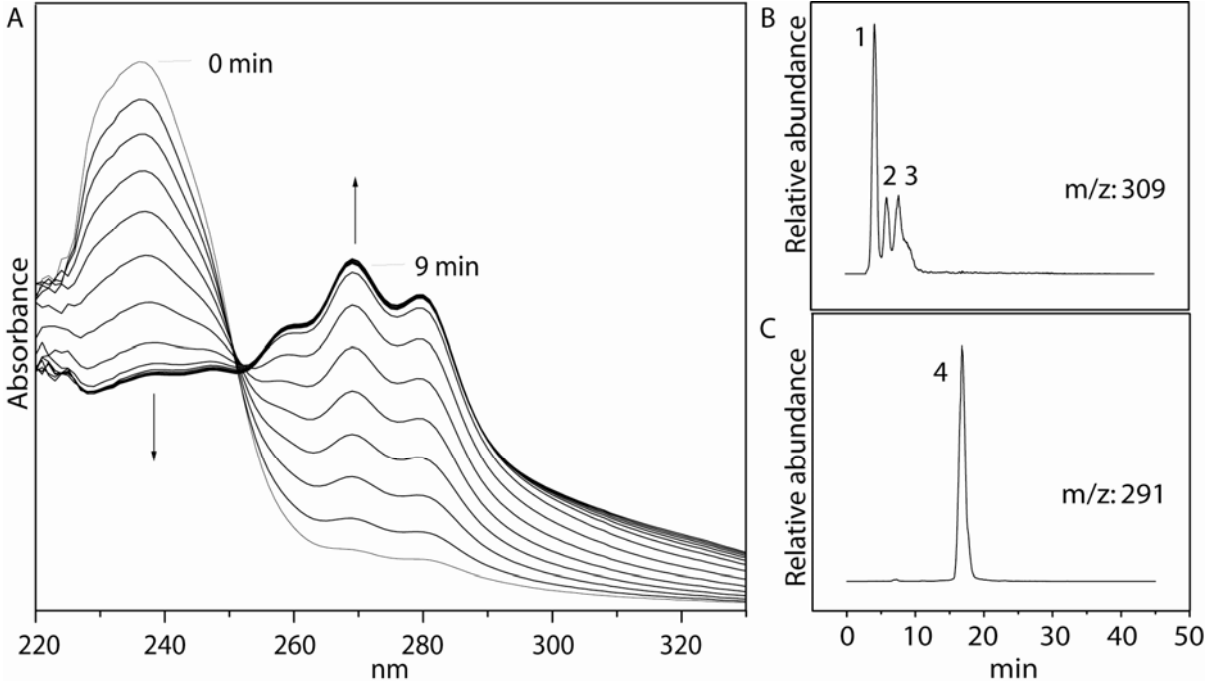

Supplement: supp_M109.094771_jbc.M109.094771-1.pdf [file supp_M109.094771_jbc.M109.094771-1.pdf]
